# Supplementary material
Source: PubMed Central journal article supplement (PMC524389)
Supplement: 7600421s3.pdf [file 7600421s3.pdf]

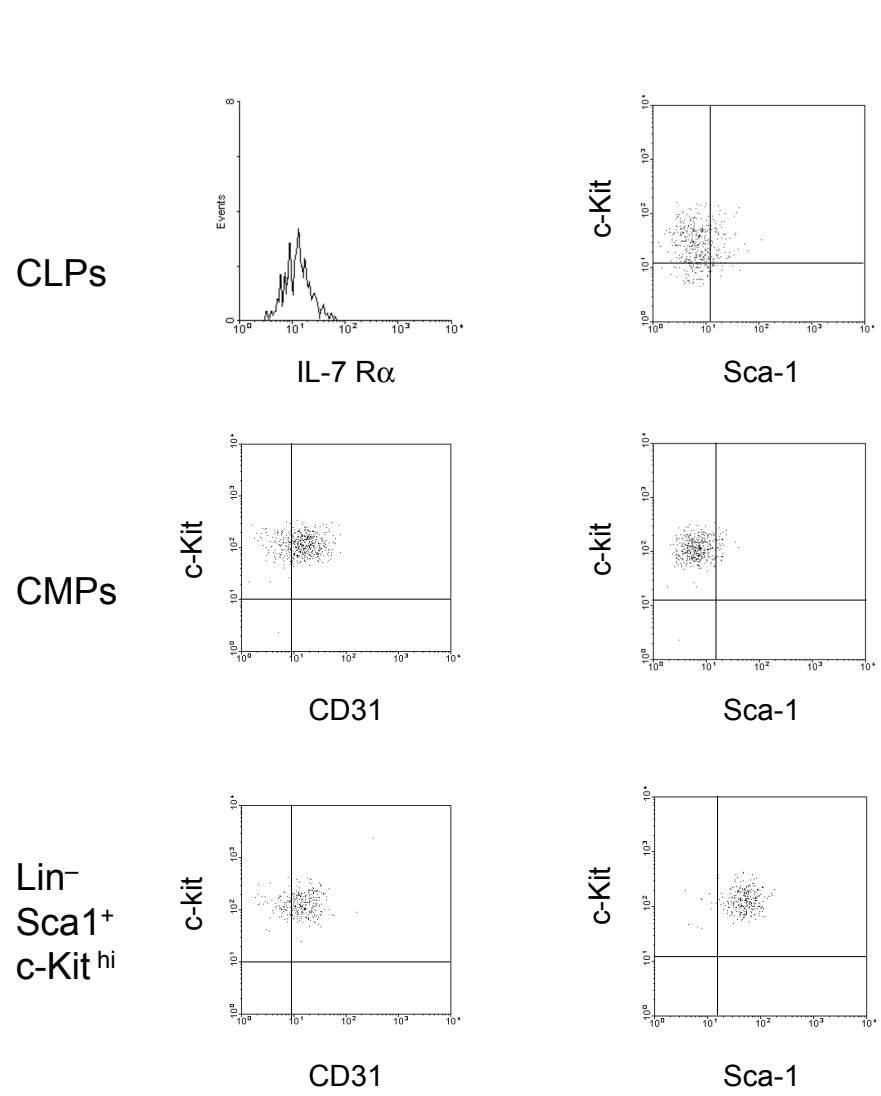

Bone marrow monocytes

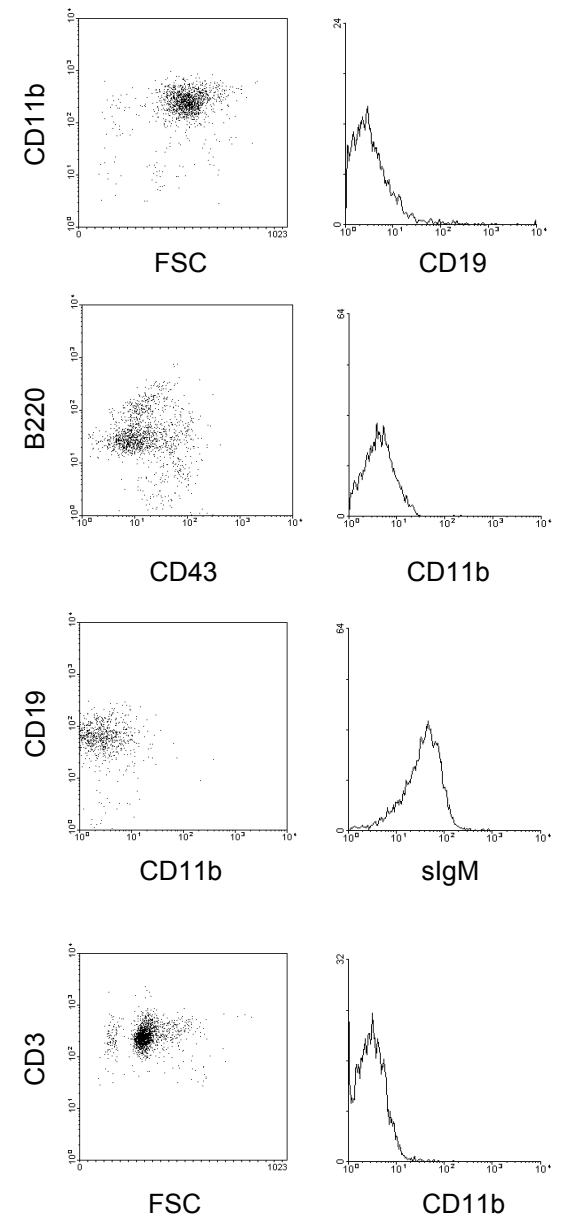

Suppl. Figure 2

**Figure S2:** Re-Analysis of purified cell populations by flow cytometry using antibodies against the indicated surface markers.
