# Supplementary material
Source: PubMed Central journal article supplement (PMC524389)
Supplement: 7600421s5.pdf [file 7600421s5.pdf]

**Figure S4: Summary of transcription factor-binding sites, conserved nucleotides, and restriction enzyme recognition sequences at the promoter (second row), FIRE-1kb (third row), and FIRE (bottom row).** Arrows indicate transcription start sites. The transcription factor binding sites are shown as open squares and restriction enzyme recognition sites as hatched squares. Asterisks (\*) between the upper and lower DNA strand indicates nucleotides, which are conserved between human and mouse.
